# Supplementary material for: Effects of Mott–Schottky Frequency Selection and Other Controlling Factors on Flat-Band Potential and Band-Edge Position Determination of TiO2
Source: MDPI journal article supplement (doi:10.3390/catal13061000), 2023-06-13
Supplement: s1 [file s1]

**Table S1:** Ana(400)-fs&fs.

| <b>f</b><br><b>(Hz)</b> | <b>V<sub>fb</sub></b><br><b>(V vs Ag/AgCl)</b> | <b>V<sub>fb</sub></b><br><b>(V vs SHE)</b> | <b>E<sub>F</sub></b><br><b>(eV)</b> | <b>N<sub>d</sub></b><br><b>(cm<sup>-3</sup>)</b> | <b>ΔE</b><br><b>(eV)</b> | <b>E<sub>g</sub></b><br><b>(eV)</b> | <b>E<sub>c</sub></b><br><b>(V vs SHE)</b> | <b>E<sub>v</sub></b><br><b>(V vs SHE)</b> |
|-------------------------|------------------------------------------------|--------------------------------------------|-------------------------------------|--------------------------------------------------|--------------------------|-------------------------------------|-------------------------------------------|-------------------------------------------|
| 10                      | -0.46                                          | -0.255                                     | -4.185                              | 2.06E+21                                         | 0.186                    | 3.30                                | -0.441                                    | 2.859                                     |
| 25                      | -0.45                                          | -0.245                                     | -4.195                              | 2.07E+20                                         | 0.128                    | 3.30                                | -0.373                                    | 2.927                                     |
| 50                      | -0.50                                          | -0.295                                     | -4.145                              | 7.20E+20                                         | 0.160                    | 3.30                                | -0.455                                    | 2.845                                     |
| 75                      | -0.52                                          | -0.315                                     | -4.125                              | 4.54E+20                                         | 0.148                    | 3.30                                | -0.463                                    | 2.837                                     |
| 100                     | -0.46                                          | -0.255                                     | -4.185                              | 1.38E+20                                         | 0.118                    | 3.30                                | -0.373                                    | 2.927                                     |
| 200                     | -0.52                                          | -0.315                                     | -4.125                              | 6.00E+20                                         | 0.155                    | 3.30                                | -0.470                                    | 2.830                                     |
| 400                     | -0.51                                          | -0.305                                     | -4.135                              | 1.26E+20                                         | 0.116                    | 3.30                                | -0.421                                    | 2.879                                     |
| 600                     | -0.54                                          | -0.335                                     | -4.105                              | 1.79E+20                                         | 0.125                    | 3.30                                | -0.460                                    | 2.840                                     |
| 800                     | -0.55                                          | -0.345                                     | -4.095                              | 3.67E+20                                         | 0.143                    | 3.30                                | -0.488                                    | 2.812                                     |
| 1000                    | -0.52                                          | -0.315                                     | -4.125                              | 8.43E+19                                         | 0.106                    | 3.30                                | -0.421                                    | 2.879                                     |
| 2000                    | -0.54                                          | -0.335                                     | -4.105                              | 2.32E+20                                         | 0.131                    | 3.30                                | -0.466                                    | 2.834                                     |
| 3000                    | -0.53                                          | -0.325                                     | -4.115                              | 7.50E+19                                         | 0.103                    | 3.30                                | -0.428                                    | 2.872                                     |
| 4000                    | -0.56                                          | -0.355                                     | -4.085                              | 1.43E+20                                         | 0.119                    | 3.30                                | -0.474                                    | 2.826                                     |
| 5000                    | -0.53                                          | -0.325                                     | -4.115                              | 5.92E+19                                         | 0.097                    | 3.30                                | -0.422                                    | 2.878                                     |
| 6000                    | -0.55                                          | -0.345                                     | -4.095                              | 6.77E+19                                         | 0.100                    | 3.30                                | -0.445                                    | 2.855                                     |

**Table S2.** Ana(400)-ss&ss.

| <b>f</b><br><b>(Hz)</b> | <b>V<sub>fb</sub></b><br><b>(V vs Ag/AgCl)</b> | <b>V<sub>fb</sub></b><br><b>(V vs SHE)</b> | <b>E<sub>F</sub></b><br><b>(eV)</b> | <b>N<sub>d</sub></b><br><b>(cm<sup>-3</sup>)</b> | <b>ΔE</b><br><b>(eV)</b> | <b>E<sub>g</sub></b><br><b>(eV)</b> | <b>E<sub>c</sub></b><br><b>(V vs SHE)</b> | <b>E<sub>v</sub></b><br><b>(V vs SHE)</b> |
|-------------------------|------------------------------------------------|--------------------------------------------|-------------------------------------|--------------------------------------------------|--------------------------|-------------------------------------|-------------------------------------------|-------------------------------------------|
| 10                      | -0.41                                          | -0.205                                     | -4.235                              | 1.31E+21                                         | 0.175                    | 3.30                                | -0.380                                    | 2.920                                     |
| 25                      | -0.46                                          | -0.255                                     | -4.185                              | 1.26E+21                                         | 0.174                    | 3.30                                | -0.429                                    | 2.871                                     |
| 50                      | -0.51                                          | -0.305                                     | -4.135                              | 1.15E+21                                         | 0.172                    | 3.30                                | -0.477                                    | 2.823                                     |
| 75                      | -0.55                                          | -0.345                                     | -4.095                              | 1.14E+21                                         | 0.171                    | 3.30                                | -0.516                                    | 2.784                                     |
| 100                     | -0.59                                          | -0.385                                     | -4.055                              | 1.13E+21                                         | 0.171                    | 3.30                                | -0.556                                    | 2.744                                     |
| 200                     | -0.64                                          | -0.435                                     | -4.005                              | 9.79E+20                                         | 0.168                    | 3.30                                | -0.603                                    | 2.697                                     |
| 400                     | -0.70                                          | -0.495                                     | -3.945                              | 8.94E+20                                         | 0.165                    | 3.30                                | -0.660                                    | 2.640                                     |
| 600                     | -0.75                                          | -0.545                                     | -3.895                              | 7.32E+20                                         | 0.160                    | 3.30                                | -0.705                                    | 2.595                                     |
| 800                     | -0.79                                          | -0.585                                     | -3.855                              | 5.57E+20                                         | 0.153                    | 3.30                                | -0.738                                    | 2.562                                     |
| 1000                    | -0.81                                          | -0.605                                     | -3.835                              | 4.18E+20                                         | 0.146                    | 3.30                                | -0.751                                    | 2.549                                     |
| 2000                    | -0.85                                          | -0.645                                     | -3.795                              | 3.14E+20                                         | 0.139                    | 3.30                                | -0.784                                    | 2.516                                     |
| 3000                    | -0.87                                          | -0.665                                     | -3.775                              | 2.40E+20                                         | 0.132                    | 3.30                                | -0.797                                    | 2.503                                     |
| 4000                    | -0.89                                          | -0.685                                     | -3.755                              | 1.95E+20                                         | 0.127                    | 3.30                                | -0.812                                    | 2.488                                     |
| 5000                    | -0.90                                          | -0.695                                     | -3.745                              | 1.67E+20                                         | 0.123                    | 3.30                                | -0.818                                    | 2.482                                     |
| 6000                    | -0.92                                          | -0.715                                     | -3.725                              | 1.50E+20                                         | 0.120                    | 3.30                                | -0.835                                    | 2.465                                     |

**Table S3.** Ana-ss&ss.

| <b>f</b><br><b>(Hz)</b> | <b>V<sub>fb</sub></b><br><b>(V vs Ag/AgCl)</b> | <b>V<sub>fb</sub></b><br><b>(V vs SHE)</b> | <b>E<sub>F</sub></b><br><b>(eV)</b> | <b>N<sub>d</sub></b><br><b>(cm<sup>-3</sup>)</b> | <b>ΔE</b><br><b>(eV)</b> | <b>E<sub>g</sub></b><br><b>(eV)</b> | <b>E<sub>c</sub></b><br><b>(V vs SHE)</b> | <b>E<sub>v</sub></b><br><b>(V vs SHE)</b> |
|-------------------------|------------------------------------------------|--------------------------------------------|-------------------------------------|--------------------------------------------------|--------------------------|-------------------------------------|-------------------------------------------|-------------------------------------------|
| 10                      | -0.71                                          | -0.505                                     | -3.935                              | 7.99E+19                                         | 0.104                    | 3.33                                | -0.609                                    | 2.721                                     |
| 25                      | -0.74                                          | -0.532                                     | -3.908                              | 7.40E+19                                         | 0.102                    | 3.33                                | -0.634                                    | 2.696                                     |
| 50                      | -0.76                                          | -0.558                                     | -3.882                              | 7.35E+19                                         | 0.102                    | 3.33                                | -0.660                                    | 2.670                                     |
| 75                      | -0.78                                          | -0.576                                     | -3.864                              | 7.31E+19                                         | 0.102                    | 3.33                                | -0.678                                    | 2.652                                     |
| 100                     | -0.79                                          | -0.586                                     | -3.854                              | 6.64E+19                                         | 0.100                    | 3.33                                | -0.686                                    | 2.644                                     |
| 200                     | -0.81                                          | -0.607                                     | -3.833                              | 6.36E+19                                         | 0.099                    | 3.33                                | -0.706                                    | 2.624                                     |
| 400                     | -0.84                                          | -0.630                                     | -3.810                              | 6.19E+19                                         | 0.098                    | 3.33                                | -0.728                                    | 2.602                                     |

|      |       |        |        |          |       |      |        |       |
|------|-------|--------|--------|----------|-------|------|--------|-------|
| 600  | -0.85 | -0.648 | -3.792 | 6.09E+19 | 0.097 | 3.33 | -0.745 | 2.585 |
| 800  | -0.87 | -0.664 | -3.776 | 6.04E+19 | 0.097 | 3.33 | -0.761 | 2.569 |
| 1000 | -0.88 | -0.679 | -3.761 | 6.04E+19 | 0.097 | 3.33 | -0.776 | 2.554 |
| 2000 | -0.92 | -0.712 | -3.728 | 5.90E+19 | 0.097 | 3.33 | -0.809 | 2.521 |
| 3000 | -0.94 | -0.737 | -3.703 | 5.73E+19 | 0.096 | 3.33 | -0.833 | 2.497 |
| 4000 | -0.96 | -0.758 | -3.682 | 5.54E+19 | 0.095 | 3.33 | -0.853 | 2.477 |
| 5000 | -0.98 | -0.776 | -3.664 | 5.28E+19 | 0.094 | 3.33 | -0.870 | 2.460 |
| 6000 | -1.00 | -0.794 | -3.646 | 5.32E+19 | 0.094 | 3.33 | -0.888 | 2.442 |

**Table S4.** P25-fs&fs.

| <b>f</b><br><b>(Hz)</b> | <b>V<sub>fb</sub></b><br><b>(V vs Ag/AgCl)</b> | <b>V<sub>fb</sub></b><br><b>(V vs SHE)</b> | <b>E<sub>F</sub></b><br><b>(eV)</b> | <b>N<sub>d</sub></b><br><b>(cm<sup>-3</sup>)</b> | <b>ΔE</b><br><b>(eV)</b> | <b>E<sub>g</sub></b><br><b>(eV)</b> | <b>E<sub>c</sub></b><br><b>(V vs SHE)</b> | <b>E<sub>v</sub></b><br><b>(V vs SHE)</b> |
|-------------------------|------------------------------------------------|--------------------------------------------|-------------------------------------|--------------------------------------------------|--------------------------|-------------------------------------|-------------------------------------------|-------------------------------------------|
| 10                      | -0.74                                          | -0.535                                     | -3.905                              | 9.15E+19                                         | 0.108                    | 3.22                                | -0.643                                    | 2.577                                     |
| 25                      | -0.77                                          | -0.565                                     | -3.875                              | 5.58E+19                                         | 0.095                    | 3.22                                | -0.660                                    | 2.560                                     |
| 50                      | -0.75                                          | -0.545                                     | -3.895                              | 4.56E+19                                         | 0.090                    | 3.22                                | -0.635                                    | 2.585                                     |
| 75                      | -0.76                                          | -0.555                                     | -3.885                              | 5.37E+19                                         | 0.094                    | 3.22                                | -0.649                                    | 2.571                                     |
| 100                     | -0.76                                          | -0.555                                     | -3.885                              | 5.30E+19                                         | 0.094                    | 3.22                                | -0.649                                    | 2.571                                     |
| 200                     | -0.78                                          | -0.575                                     | -3.865                              | 5.56E+19                                         | 0.095                    | 3.22                                | -0.670                                    | 2.550                                     |
| 400                     | -0.85                                          | -0.645                                     | -3.795                              | 5.15E+19                                         | 0.093                    | 3.22                                | -0.738                                    | 2.482                                     |
| 600                     | -0.84                                          | -0.635                                     | -3.805                              | 5.10E+19                                         | 0.093                    | 3.22                                | -0.728                                    | 2.492                                     |
| 800                     | -0.85                                          | -0.645                                     | -3.795                              | 5.77E+19                                         | 0.096                    | 3.22                                | -0.741                                    | 2.479                                     |
| 1000                    | -0.83                                          | -0.625                                     | -3.815                              | 9.24E+19                                         | 0.108                    | 3.22                                | -0.733                                    | 2.487                                     |
| 2000                    | -0.83                                          | -0.625                                     | -3.815                              | 5.85E+19                                         | 0.096                    | 3.22                                | -0.721                                    | 2.499                                     |
| 3000                    | -0.91                                          | -0.705                                     | -3.735                              | 3.81E+19                                         | 0.086                    | 3.22                                | -0.791                                    | 2.429                                     |
| 4000                    | -0.88                                          | -0.675                                     | -3.765                              | 4.00E+19                                         | 0.087                    | 3.22                                | -0.762                                    | 2.458                                     |
| 5000                    | -0.89                                          | -0.685                                     | -3.755                              | 3.62E+19                                         | 0.084                    | 3.22                                | -0.769                                    | 2.451                                     |
| 6000                    | -0.86                                          | -0.655                                     | -3.785                              | 3.80E+19                                         | 0.086                    | 3.22                                | -0.741                                    | 2.479                                     |

**Table S5.** P25(400)-fs&fs.

| <b>f</b><br><b>(Hz)</b> | <b>V<sub>fb</sub></b><br><b>(V vs Ag/AgCl)</b> | <b>V<sub>fb</sub></b><br><b>(V vs SHE)</b> | <b>E<sub>F</sub></b><br><b>(eV)</b> | <b>N<sub>d</sub></b><br><b>(cm<sup>-3</sup>)</b> | <b>ΔE</b><br><b>(eV)</b> | <b>E<sub>g</sub></b><br><b>(eV)</b> | <b>E<sub>c</sub></b><br><b>(V vs SHE)</b> | <b>E<sub>v</sub></b><br><b>(V vs SHE)</b> |
|-------------------------|------------------------------------------------|--------------------------------------------|-------------------------------------|--------------------------------------------------|--------------------------|-------------------------------------|-------------------------------------------|-------------------------------------------|
| 10                      | -0.46                                          | -0.255                                     | -4.185                              | 2.06E+21                                         | 0.186                    | 3.21                                | -0.441                                    | 2.769                                     |
| 25                      | -0.54                                          | -0.335                                     | -4.105                              | 2.51E+21                                         | 0.191                    | 3.21                                | -0.526                                    | 2.684                                     |
| 50                      | -0.52                                          | -0.315                                     | -4.125                              | 3.61E+20                                         | 0.142                    | 3.21                                | -0.457                                    | 2.753                                     |
| 75                      | -0.52                                          | -0.315                                     | -4.125                              | 9.46E+20                                         | 0.167                    | 3.21                                | -0.482                                    | 2.728                                     |
| 100                     | -0.59                                          | -0.385                                     | -4.055                              | 1.13E+21                                         | 0.171                    | 3.21                                | -0.556                                    | 2.654                                     |
| 200                     | -0.55                                          | -0.345                                     | -4.095                              | 4.03E+20                                         | 0.145                    | 3.21                                | -0.490                                    | 2.720                                     |
| 400                     | -0.62                                          | -0.415                                     | -4.025                              | 7.23E+20                                         | 0.160                    | 3.21                                | -0.575                                    | 2.635                                     |
| 600                     | -0.58                                          | -0.375                                     | -4.065                              | 6.91E+20                                         | 0.159                    | 3.21                                | -0.534                                    | 2.676                                     |
| 800                     | -0.55                                          | -0.345                                     | -4.095                              | 1.19E+20                                         | 0.114                    | 3.21                                | -0.459                                    | 2.751                                     |
| 1000                    | -0.59                                          | -0.385                                     | -4.055                              | 4.96E+20                                         | 0.150                    | 3.21                                | -0.535                                    | 2.675                                     |
| 2000                    | -0.60                                          | -0.395                                     | -4.045                              | 3.89E+20                                         | 0.144                    | 3.21                                | -0.539                                    | 2.671                                     |
| 3000                    | -0.63                                          | -0.425                                     | -4.015                              | 2.98E+20                                         | 0.138                    | 3.21                                | -0.563                                    | 2.647                                     |
| 4000                    | -0.69                                          | -0.485                                     | -3.955                              | 2.84E+20                                         | 0.136                    | 3.21                                | -0.621                                    | 2.589                                     |
| 5000                    | -0.64                                          | -0.435                                     | -4.005                              | 2.32E+20                                         | 0.131                    | 3.21                                | -0.566                                    | 2.644                                     |
| 6000                    | -0.68                                          | -0.475                                     | -3.965                              | 2.34E+20                                         | 0.131                    | 3.21                                | -0.606                                    | 2.604                                     |

Table S6. P25(400)-ss&amp;ss.

| f<br>(Hz) | V <sub>fb</sub><br>(V vs Ag/AgCl) | V <sub>fb</sub><br>(V vs SHE) | E <sub>F</sub><br>(eV) | N <sub>d</sub><br>(cm <sup>-3</sup> ) | ΔE<br>(eV) | E <sub>g</sub><br>(eV) | E <sub>c</sub><br>(V vs SHE) | E <sub>v</sub><br>(V vs SHE) |
|-----------|-----------------------------------|-------------------------------|------------------------|---------------------------------------|------------|------------------------|------------------------------|------------------------------|
| 10        | -0.43                             | -0.225                        | -4.215                 | 1.94E+21                              | 0.185      | 3.21                   | -0.410                       | 2.800                        |
| 25        | -0.52                             | -0.315                        | -4.125                 | 1.89E+21                              | 0.184      | 3.21                   | -0.499                       | 2.711                        |
| 50        | -0.63                             | -0.425                        | -4.015                 | 2.62E+21                              | 0.192      | 3.21                   | -0.617                       | 2.593                        |
| 75        | -0.66                             | -0.455                        | -3.985                 | 1.20E+21                              | 0.173      | 3.21                   | -0.628                       | 2.582                        |
| 100       | -0.71                             | -0.505                        | -3.935                 | 9.68E+20                              | 0.167      | 3.21                   | -0.672                       | 2.538                        |
| 200       | -0.75                             | -0.545                        | -3.895                 | 4.95E+20                              | 0.150      | 3.21                   | -0.695                       | 2.515                        |
| 400       | -0.77                             | -0.565                        | -3.875                 | 4.74E+20                              | 0.149      | 3.21                   | -0.714                       | 2.496                        |
| 600       | -0.79                             | -0.585                        | -3.855                 | 4.04E+20                              | 0.145      | 3.21                   | -0.730                       | 2.480                        |
| 800       | -0.80                             | -0.595                        | -3.845                 | 3.63E+20                              | 0.143      | 3.21                   | -0.738                       | 2.472                        |
| 1000      | -0.81                             | -0.605                        | -3.835                 | 3.25E+20                              | 0.140      | 3.21                   | -0.745                       | 2.465                        |
| 2000      | -0.84                             | -0.635                        | -3.805                 | 2.43E+20                              | 0.132      | 3.21                   | -0.767                       | 2.443                        |
| 3000      | -0.86                             | -0.655                        | -3.785                 | 1.93E+20                              | 0.127      | 3.21                   | -0.782                       | 2.428                        |
| 4000      | -0.87                             | -0.665                        | -3.775                 | 1.68E+20                              | 0.123      | 3.21                   | -0.788                       | 2.422                        |
| 5000      | -0.89                             | -0.685                        | -3.755                 | 1.50E+20                              | 0.120      | 3.21                   | -0.805                       | 2.405                        |
| 6000      | -0.90                             | -0.695                        | -3.745                 | 1.37E+20                              | 0.118      | 3.21                   | -0.813                       | 2.397                        |

Table S7. P25(400)-ss&amp;ss+stir.

| f<br>(Hz) | V <sub>fb</sub><br>(V vs Ag/AgCl) | V <sub>fb</sub><br>(V vs SHE) | E <sub>F</sub><br>(eV) | N <sub>d</sub><br>(cm <sup>-3</sup> ) | ΔE<br>(eV) | E <sub>g</sub><br>(eV) | E <sub>c</sub><br>(V vs SHE) | E <sub>v</sub><br>(V vs SHE) |
|-----------|-----------------------------------|-------------------------------|------------------------|---------------------------------------|------------|------------------------|------------------------------|------------------------------|
| 10        | -0.53                             | -0.325                        | -4.115                 | 1.44E+21                              | 0.177      | 3.21                   | -0.502                       | 2.708                        |
| 25        | -0.69                             | -0.485                        | -3.955                 | 1.71E+21                              | 0.182      | 3.21                   | -0.667                       | 2.543                        |
| 50        | -0.73                             | -0.525                        | -3.915                 | 1.14E+21                              | 0.171      | 3.21                   | -0.696                       | 2.514                        |
| 75        | -0.74                             | -0.535                        | -3.905                 | 9.91E+20                              | 0.168      | 3.21                   | -0.703                       | 2.507                        |
| 100       | -0.75                             | -0.545                        | -3.895                 | 9.52E+20                              | 0.167      | 3.21                   | -0.712                       | 2.498                        |
| 200       | -0.76                             | -0.555                        | -3.885                 | 6.17E+20                              | 0.156      | 3.21                   | -0.711                       | 2.499                        |
| 400       | -0.78                             | -0.575                        | -3.865                 | 5.10E+20                              | 0.151      | 3.21                   | -0.726                       | 2.484                        |
| 600       | -0.79                             | -0.585                        | -3.855                 | 4.16E+20                              | 0.146      | 3.21                   | -0.731                       | 2.479                        |
| 800       | -0.80                             | -0.595                        | -3.845                 | 4.01E+20                              | 0.145      | 3.21                   | -0.740                       | 2.470                        |
| 1000      | -0.81                             | -0.605                        | -3.835                 | 3.60E+20                              | 0.142      | 3.21                   | -0.747                       | 2.463                        |
| 2000      | -0.83                             | -0.625                        | -3.815                 | 2.78E+20                              | 0.136      | 3.21                   | -0.761                       | 2.449                        |
| 3000      | -0.85                             | -0.645                        | -3.795                 | 2.12E+20                              | 0.129      | 3.21                   | -0.774                       | 2.436                        |
| 4000      | -0.87                             | -0.665                        | -3.775                 | 1.85E+20                              | 0.126      | 3.21                   | -0.791                       | 2.419                        |
| 5000      | -0.88                             | -0.675                        | -3.765                 | 1.80E+20                              | 0.125      | 3.21                   | -0.800                       | 2.410                        |
| 6000      | -0.90                             | -0.695                        | -3.745                 | 1.64E+20                              | 0.122      | 3.21                   | -0.817                       | 2.393                        |

Table S8. Ana(400)-ss&amp;ss under UV.

| Time<br>(min) | f<br>(Hz) | V <sub>fb</sub><br>(V vs Ag/AgCl) | V <sub>fb</sub><br>(V vs SHE) | E <sub>F</sub><br>(eV) | N <sub>d</sub><br>(cm <sup>-3</sup> ) | ΔE<br>(eV) | E <sub>g</sub><br>(eV) | E <sub>c</sub><br>(V vs SHE) | E <sub>v</sub><br>(V vs SHE) |
|---------------|-----------|-----------------------------------|-------------------------------|------------------------|---------------------------------------|------------|------------------------|------------------------------|------------------------------|
| 12            | 400       | -0.44                             | -0.235                        | -4.205                 | 3.13E+20                              | 0.139      | 3.3                    | -0.374                       | 2.926                        |
| 24            |           | -0.40                             | -0.195                        | -4.245                 | 3.61E+20                              | 0.142      |                        | -0.337                       | 2.963                        |
| 36            |           | -0.41                             | -0.205                        | -4.235                 | 3.56E+20                              | 0.142      |                        | -0.347                       | 2.953                        |
| 48            |           | -0.42                             | -0.215                        | -4.225                 | 3.91E+20                              | 0.144      |                        | -0.359                       | 2.941                        |
| 60            |           | -0.44                             | -0.235                        | -4.205                 | 3.91E+20                              | 0.144      |                        | -0.379                       | 2.921                        |
| 72            |           | -0.45                             | -0.245                        | -4.195                 | 3.46E+20                              | 0.141      |                        | -0.386                       | 2.914                        |
| 84            |           | -0.47                             | -0.265                        | -4.175                 | 3.23E+20                              | 0.140      |                        | -0.405                       | 2.895                        |

|    |       |        |        |          |       |        |       |
|----|-------|--------|--------|----------|-------|--------|-------|
| 96 | -0.49 | -0.285 | -4.155 | 3.22E+20 | 0.140 | -0.425 | 2.875 |
|----|-------|--------|--------|----------|-------|--------|-------|

**Table S9.** Ana(400)-ss&ss under laboratory light.

| Time<br>(min) | f<br>(Hz) | V <sub>fb</sub><br>(V vs Ag/AgCl) | V <sub>fb</sub><br>(V vs SHE) | E <sub>F</sub><br>(eV) | N <sub>d</sub><br>(cm <sup>-3</sup> ) | ΔE<br>(eV) | E <sub>g</sub><br>(eV) | E <sub>c</sub><br>(V vs SHE) | E <sub>v</sub><br>(V vs SHE) |
|---------------|-----------|-----------------------------------|-------------------------------|------------------------|---------------------------------------|------------|------------------------|------------------------------|------------------------------|
| 12            | 400       | -0.47                             | -0.265                        | -4.175                 | 9.45E+19                              | 0.109      | 3.3                    | -0.374                       | 2.926                        |
| 24            |           | -0.49                             | -0.285                        | -4.155                 | 9.65E+19                              | 0.109      |                        | -0.394                       | 2.906                        |
| 36            |           | -0.51                             | -0.305                        | -4.135                 | 9.87E+19                              | 0.110      |                        | -0.415                       | 2.885                        |
| 48            |           | -0.52                             | -0.315                        | -4.125                 | 1.08E+20                              | 0.112      |                        | -0.427                       | 2.873                        |
| 60            |           | -0.54                             | -0.335                        | -4.105                 | 1.06E+20                              | 0.111      |                        | -0.446                       | 2.854                        |
| 72            |           | -0.57                             | -0.365                        | -4.075                 | 1.17E+20                              | 0.114      |                        | -0.479                       | 2.821                        |
| 84            |           | -0.58                             | -0.375                        | -4.065                 | 1.18E+20                              | 0.114      |                        | -0.489                       | 2.811                        |
| 96            |           | -0.60                             | -0.395                        | -4.045                 | 1.18E+20                              | 0.114      |                        | -0.509                       | 2.791                        |

**Table S10.** Ana(400)-ss&ss in the dark.

| Time<br>(min) | f<br>(Hz) | V <sub>fb</sub><br>(V vs Ag/AgCl) | V <sub>fb</sub><br>(V vs SHE) | E <sub>F</sub><br>(eV) | N <sub>d</sub><br>(cm <sup>-3</sup> ) | ΔE<br>(eV) | E <sub>g</sub><br>(eV) | E <sub>c</sub><br>(V vs SHE) | E <sub>v</sub><br>(V vs SHE) |
|---------------|-----------|-----------------------------------|-------------------------------|------------------------|---------------------------------------|------------|------------------------|------------------------------|------------------------------|
| 12            | 400       | -0.52                             | -0.315                        | -4.125                 | 5.38E+20                              | 0.152      | 3.3                    | -0.467                       | 2.833                        |
| 24            |           | -0.56                             | -0.355                        | -4.085                 | 6.87E+20                              | 0.159      |                        | -0.514                       | 2.786                        |
| 36            |           | -0.59                             | -0.385                        | -4.055                 | 8.19E+20                              | 0.163      |                        | -0.548                       | 2.752                        |
| 48            |           | -0.61                             | -0.405                        | -4.035                 | 9.65E+20                              | 0.167      |                        | -0.572                       | 2.728                        |
| 60            |           | -0.63                             | -0.425                        | -4.015                 | 1.07E+21                              | 0.170      |                        | -0.595                       | 2.705                        |
| 72            |           | -0.65                             | -0.445                        | -3.995                 | 1.07E+21                              | 0.170      |                        | -0.615                       | 2.685                        |
| 84            |           | -0.65                             | -0.445                        | -3.995                 | 1.09E+21                              | 0.170      |                        | -0.615                       | 2.685                        |
| 96            |           | -0.66                             | -0.455                        | -3.985                 | 1.06E+21                              | 0.170      |                        | -0.625                       | 2.675                        |

**Table S11.** Ana(400)-ss&ss at Different pHs.

| pH     | f<br>(Hz) | V <sub>fb</sub><br>(V vs Ag/AgCl) | V <sub>fb</sub><br>(V vs SHE) | E <sub>F</sub><br>(eV) | N <sub>d</sub><br>(cm <sup>-3</sup> ) | ΔE<br>(eV) | E <sub>g</sub><br>(eV) | E <sub>c</sub><br>(V vs SHE) | E <sub>v</sub><br>(V vs SHE) |
|--------|-----------|-----------------------------------|-------------------------------|------------------------|---------------------------------------|------------|------------------------|------------------------------|------------------------------|
| 1.637  | 400       | -0.19                             | 0.015                         | -4.455                 | 2.07E+20                              | 0.128      | 3.3                    | -0.113                       | 3.187                        |
| 2.166  |           | -0.18                             | 0.025                         | -4.465                 | 1.96E+20                              | 0.127      |                        | -0.102                       | 3.198                        |
| 2.973  |           | -0.28                             | -0.075                        | -4.365                 | 3.15E+20                              | 0.139      |                        | -0.214                       | 3.086                        |
| 4.462  |           | -0.53                             | -0.325                        | -4.115                 | 3.97E+20                              | 0.145      |                        | -0.470                       | 2.830                        |
| 5.242  |           | -0.50                             | -0.295                        | -4.145                 | 3.92E+20                              | 0.144      |                        | -0.439                       | 2.861                        |
| 6.218  |           | -0.51                             | -0.305                        | -4.135                 | 3.77E+20                              | 0.143      |                        | -0.448                       | 2.852                        |
| 5.990  |           | -0.56                             | -0.355                        | -4.085                 | 1.24E+20                              | 0.115      |                        | -0.470                       | 2.830                        |
| 7.222  |           | -0.58                             | -0.375                        | -4.065                 | 1.22E+20                              | 0.115      |                        | -0.490                       | 2.810                        |
| 8.774  |           | -0.59                             | -0.385                        | -4.055                 | 1.27E+20                              | 0.116      |                        | -0.501                       | 2.799                        |
| 9.081  |           | -0.61                             | -0.405                        | -4.035                 | 1.29E+20                              | 0.116      |                        | -0.521                       | 2.779                        |
| 9.638  |           | -0.63                             | -0.425                        | -4.015                 | 1.38E+20                              | 0.118      |                        | -0.543                       | 2.757                        |
| 11.556 |           | -0.89                             | -0.685                        | -3.755                 | 2.04E+20                              | 0.128      |                        | -0.813                       | 2.487                        |
| 12.107 |           | -0.97                             | -0.765                        | -3.675                 | 1.76E+20                              | 0.124      |                        | -0.889                       | 2.411                        |
